# Supplementary material for: Medication Intake as a Factor for Non-Initiation and Cessation of Breastfeeding: A Prospective Cohort Study in Greece during the COVID-19 Pandemic
Source: MDPI journal article supplement (doi:10.3390/children10030586), 2023-03-18
Supplement: s1 [file s1]

**Table S1.** Medicines that women used during the postpartum period and show disagreement in risk classification according to Lactmed and Hale. (Attica/Greece 2020; N=847)

| ATC   | Medication     | Lactmed                                                                                                                  | Hale                                                  | N   | %    |
|-------|----------------|--------------------------------------------------------------------------------------------------------------------------|-------------------------------------------------------|-----|------|
| J01MA | Ciprofloxacin  | Probably Compatible. Avoiding BF for 3-4 hours decreases the exposure.                                                   | L3. Use alternative drugs if possible.                | 11  | 1.3  |
| J01FF | Clindamycin    | Probably Compatible. Use alternative drugs if possible.                                                                  | L2. LD. Probably Compatible.                          | 4   | 0.5  |
| N02AB | Meperidine     | LD. Infant's sedation. Use alternative drugs.                                                                            | L4                                                    | 7   | 0.8  |
| J01XD | Metronidazole  | Opinions vary. Avoid long term therapy. Avoid BF for 12-24h after last maternal dose. Use alternative drugs if possible. | L2                                                    | 224 | 26.4 |
| J01XE | Nitrofurantoin | Avoid BF when infant <8 days or G6PD deficiency. Use alternative drugs.                                                  | L2. Avoid BF when infant <1 month or G6PD deficiency. | 2   | 0.2  |
| A02BA | Ranitidine     | Use alternative drugs. Ranitidine spontaneously breaks down to a cancer-causing chemical.                                | L2                                                    | 7   | 0.8  |
| N02CC | Sumatriptan    | LD. Probably Compatible. Withholding breastfeeding in preterm infants might be helpful.                                  | L3                                                    | 2   | 0.2  |
| N03AG | Valproic Acid  | Probably Compatible. Monitor infant for side effects.                                                                    | L4. Neurobehavioral complications.                    | 2   | 0.2  |

BF: Breastfeeding, LD: Limited Data.

**Table S2.** Risk classification of medicines used during the postpartum period according to Lactmed and Hale.(Attica/Greece 2020; N=847).

| ATC            | Medication                                | Lactmed                                                                                                                                                                                                              | Hale                                                                  | N   | %    |
|----------------|-------------------------------------------|----------------------------------------------------------------------------------------------------------------------------------------------------------------------------------------------------------------------|-----------------------------------------------------------------------|-----|------|
| B01AC          | Acetylosalicylic Acid                     | Probably compatible (lowdose).                                                                                                                                                                                       | L2                                                                    | 7   | 0.8  |
| J05AB          | Acyclovir                                 | Compatible.                                                                                                                                                                                                          | L2                                                                    | 1   | 0.1  |
| L04AB          | Adalimumab                                | LD. Probably compatible.                                                                                                                                                                                             | L3                                                                    | 4   | 0.5  |
| L04AA          | Alemtuzumab                               | ND. Use with caution or avoid, especially while nursing a newborn or preterm infant.                                                                                                                                 | L4                                                                    | 1   | 0.1  |
| G04CA          | Alfuzosin                                 | Not classified.                                                                                                                                                                                                      | L4                                                                    | 1   | 0.1  |
| N05BA          | Alprazolam                                | LD. Probably Compatible in low dose and short-term use. Use alternative drugs.                                                                                                                                       | L3                                                                    | 2   | 0.2  |
| A02AD          | Aluminium Hydroxide & Magnesium Hydroxide | AH: Not classified.<br>MH: Compatible.                                                                                                                                                                               | AH: Not classified.<br>MH: L1                                         | 2   | 0.2  |
| R05CB          | Ambroxol                                  | Not classified.                                                                                                                                                                                                      | Not classified.                                                       | 2   | 0.2  |
| J01MB          | Amikacin                                  | Probably compatible.                                                                                                                                                                                                 | L2                                                                    | 6   | 0.7  |
| C08CA          | Amlodipine                                | LD. Probably compatible.                                                                                                                                                                                             | L3                                                                    | 1   | 0.1  |
| J01CA          | Amoxicillin                               | LD. Compatible.                                                                                                                                                                                                      | L1                                                                    | 14  | 1.7  |
| J01CAR         | Amoxicillin & Clavulanic Acid             | LD. Compatible.                                                                                                                                                                                                      | L1                                                                    | 10  | 1.2  |
| J01CA          | Ampicillin                                | Compatible.                                                                                                                                                                                                          | L1                                                                    | 7   | 0.8  |
| N05AX          | Aripiprazole                              | LD. Probably Compatible in low doses. Use alternative drugs if possible. May suppress lactation.                                                                                                                     | L3. May suppress lactation.                                           | 2   | 0.2  |
| C10AA          | Atorvastatin                              | ND. Use alternative drugs.                                                                                                                                                                                           | L3                                                                    | 1   | 0.1  |
| L04AX          | Azathioprine                              | Probably Compatible. Use with caution during BF. Avoiding BF for 4 hours markedly decreases drug levels in breast milk.                                                                                              | L3. Use with caution. Monitor infants for signs of immunosuppression. | 3   | 0.4  |
| J01FA          | Azithromycin                              | Probably Compatible. Risk for infantile hypertrophic pyloric stenosis (?).                                                                                                                                           | L2                                                                    | 4   | 0.5  |
| D07CC          | Betamethasone & Gentamycine (Topical)     | Compatible for short-term topical use. Avoid nipple area.                                                                                                                                                            | L3                                                                    | 2   | 0.2  |
| N05BA          | Bromazepam                                | Not classified.                                                                                                                                                                                                      | Not classified.                                                       | 2   | 0.2  |
| R05CB          | Bromhexine                                | Not classified.                                                                                                                                                                                                      | Not classified.                                                       | 2   | 0.2  |
| R01AD          | Budesonide                                | Compatible.                                                                                                                                                                                                          | L1                                                                    | 2   | 0.2  |
| N07BC<br>V03AB | Buprenorphine & Naloxone                  | LD. Probably Compatible.                                                                                                                                                                                             | L2                                                                    | 1   | 0.1  |
| A03D           | Butylscopolamine&P aracetamole            | Not classified.                                                                                                                                                                                                      | Not classified.                                                       | 10  | 1.2  |
| G02CB          | Cabergolin                                | ND. Probably Compatible. Suppresses Lactation – Avoid during lactation (Women treated with cabergoline for pituitary adenomas who become pregnant can breastfeed their infants with no apparent risk of recurrence). | L3. Careful administration in patient with hyperprolactinemia.        | 111 | 13.1 |
| A12A           | Calcium Salt                              | Not classified.                                                                                                                                                                                                      | L3                                                                    | 558 | 65.9 |
| N03AF          | Carbamazepine                             | LD. Probably compatible.                                                                                                                                                                                             | L2                                                                    | 1   | 0.1  |

|       |                                  |                                                                                                                        |                                                                             |     |      |
|-------|----------------------------------|------------------------------------------------------------------------------------------------------------------------|-----------------------------------------------------------------------------|-----|------|
| J01DC | Cefaclor                         | LD. Compatible.                                                                                                        | L1                                                                          | 66  | 7.8  |
| J01DC | Cefoxitin                        | Compatible.                                                                                                            | L1                                                                          | 239 | 28.2 |
| J01DD | Ceftriaxone                      | LD. Compatible.                                                                                                        | L1                                                                          | 20  | 2.4  |
| J01DC | Cefuroxime                       | LD. Probably compatible.                                                                                               | L2                                                                          | 326 | 38.5 |
| R06AE | Cetirizine                       | Compatible. High doses may decrease milk supply.                                                                       | L2                                                                          | 1   | 0.1  |
| A02BA | Cimetidine                       | LD. Probably Compatible for infants >2 months—Use alternative drugs (potential for causing hepatic enzyme inhibition). | L1. Compatible for short-term Use alternative drugs if possible.            | 4   | 0.5  |
| J01MA | Ciprofloxacin                    | Probably Compatible. Avoiding BF for 3-4 hours decreases the exposure.                                                 | L3. Use alternative drugs if possible.                                      | 11  | 1.3  |
| N06AB | Citalopram                       | LD. Probably Compatible. Use alternative drugs if possible.                                                            | L2. Use alternative drugs if possible.                                      | 2   | 0.2  |
| J01FA | Clarithromycin                   | Probably Compatible. Risk for infantile hypertrophic pyloric stenosis (?).                                             | L1                                                                          | 7   | 0.8  |
| J01FF | Clindamycin                      | Probably Compatible. Use alternative drugs if possible.                                                                | L2                                                                          | 4   | 0.5  |
| N03AE | Clonazepam                       | Compatible to use cautiously. Use alternative drugs if possible (long half-life).                                      | L3                                                                          | 1   | 0.1  |
| M01AB | Diclofenac                       | LD. Probably Compatible.                                                                                               | L2                                                                          | 679 | 80.2 |
| R01AD | Dexamethasone (Topical)          | ND. Probably Compatible.                                                                                               | L3                                                                          | 3   | 0.4  |
| R06AB | Dimethindene                     | Not classified.                                                                                                        | Not classified.                                                             | 3   | 0.4  |
| L04AX | Dimethyl fumarate                | LD. Probably Compatible.                                                                                               | L2                                                                          | 2   | 0.2  |
| J01AA | Doxycycline                      | Compatible in short-term use. Avoid prolonged use.                                                                     | L3. Avoid prolonged use >21 days (dental staining or decrease bone growth). | 1   | 0.1  |
| G03AA | Drospirenone&Ethinyl lestradiol  | Not classified.                                                                                                        | L3. May suppress lactation.                                                 | 3   | 0.4  |
| G02AB | Ergometrine or Ergonovin Maleate | Avoid during lactation. Lowers PRL, decreases BF rates.                                                                | L3. Avoid prolonged use, may suppress lactation.                            | 559 | 66   |
| J01FA | Erythromycin                     | Probably Compatible. Risk for infantile hypertrophic pyloric stenosis (?).                                             | L3. Risk for infantile hypertrophic pyloric stenosis (?).                   | 2   | 0.2  |
| N06AB | Escitalopram                     | LD. Probably Compatible.                                                                                               | L2                                                                          | 5   | 0.6  |
| M01AH | Etoricoxib                       | Not classified.                                                                                                        | Not classified.                                                             | 1   | 0.1  |
| N01AH | Fentanyl                         | LD. Probably Compatible (low dose).                                                                                    | L2                                                                          | 631 | 74.5 |
| G01AF | Fenticonazole                    | Not classified.                                                                                                        | Not classified.                                                             | 2   | 0.2  |
| B03A  | Ferrous Sulfate                  | Compatible.                                                                                                            | L1                                                                          | 642 | 75.8 |
| L04AA | Fingolimod                       | Avoid during lactation. Potential toxicity to the infant.                                                              | L5                                                                          | 2   | 0.2  |
| H02AA | Fludrocortisone                  | Not classified.                                                                                                        | L3                                                                          | 4   | 0.5  |
| N06AB | Fluoxetine                       | LD. Probably Compatible. Use alternative drugs if possible.                                                            | L2. Use alternative drugs if possible.                                      | 1   | 0.1  |
| B03BB | Folic Acid                       | Not classified.                                                                                                        | L1                                                                          | 47  | 5.5  |
| V08CA | Gadobutrol                       | LD. Probably Compatible. Use alternative agents with published experience.                                             | L3                                                                          | 1   | 0.1  |
| J01MB | Gentamicin                       | LD. Probably Compatible.                                                                                               | L2                                                                          | 15  | 1.8  |
| S01CA | Gentamicin & Dexamethasone       | LD. Probably Compatible.                                                                                               | Not classified.                                                             | 2   | 0.2  |

|       |                                |                                                                                                                                                 |                                                                                                                            |     |      |
|-------|--------------------------------|-------------------------------------------------------------------------------------------------------------------------------------------------|----------------------------------------------------------------------------------------------------------------------------|-----|------|
| B01AB | Heparin (low molecular weight) | ND. Probably Compatible.                                                                                                                        | L2                                                                                                                         | 474 | 56   |
| J06BA | Human Immunoglobulin G         | Compatible.                                                                                                                                     | Not classified.                                                                                                            | 1   | 0.1  |
| H02AB | Hydrocortisone                 | ND. Use alternative drugs.                                                                                                                      | L3. Low dosages, short-term use.                                                                                           | 12  | 1.4  |
| P01BA | Hydroxychloroquine             | LD. Probably Compatible.                                                                                                                        | L2                                                                                                                         | 4   | 0.5  |
| N05BB | Hydroxyzine                    | LD. Compatible in small doses. Larger doses or prolonged use may cause drowsiness to the infant or decrease milk supply. Use alternative drugs. | L2                                                                                                                         | 1   | 0.1  |
| L04AB | Infliximab                     | LD. Probably Compatible.                                                                                                                        | L3                                                                                                                         | 4   | 0.5  |
| J07BB | Influenza virus vaccines       | Compatible.                                                                                                                                     | L1                                                                                                                         | 2   | 0.2  |
| A10AE | Insulin                        | Compatible.                                                                                                                                     | L2                                                                                                                         | 3   | 0.4  |
| C07AG | Labetalol                      | LD. Probably Compatible. Use alternative drugs for preterm infants.                                                                             | L2                                                                                                                         | 2   | 0.2  |
| A06AD | Lactulose                      | Not classified.                                                                                                                                 | L3                                                                                                                         | 11  | 1.3  |
| N03AX | Lamotrigine                    | Compatible.                                                                                                                                     | L2                                                                                                                         | 2   | 0.2  |
| N03AX | Levetiracetam                  | Probably Compatible. Might reduce milk supply.                                                                                                  | L2                                                                                                                         | 1   | 0.1  |
| R06AE | Levocetirizine                 | LD. Probably Compatible. High doses may decrease milk supply.                                                                                   | L2                                                                                                                         | 4   | 0.5  |
| H03AA | Levothyroxine                  | LD. Compatible.                                                                                                                                 | L1                                                                                                                         | 192 | 22.7 |
| N01BB | Lidocaine                      | Compatible.                                                                                                                                     | L2                                                                                                                         | 44  | 5.2  |
| M01AC | Lornoxicam                     | Not classified.                                                                                                                                 | Not classified.                                                                                                            | 59  | 7.0  |
| A12CC | Magnesium Aspartate            | ND. Probably Compatible.                                                                                                                        | Not classified.                                                                                                            | 21  | 2.5  |
| A12CC | Magnesium Oxide                | ND. Probably Compatible.                                                                                                                        | Not classified.                                                                                                            | 1   | 0.1  |
| N02AB | Meperidine                     | LD. Infant's sedation. Use alternative drugs.                                                                                                   | L4                                                                                                                         | 7   | 0.8  |
| J01DH | Meropenem                      | ND. Probably Compatible.                                                                                                                        | L3                                                                                                                         | 1   | 0.1  |
| A07EC | Mesalamine                     | Not classified.                                                                                                                                 | L3                                                                                                                         | 1   | 0.1  |
| A10BA | Metformin                      | Compatible. Use with caution in newborn, preterm infants and those with renal impairment.                                                       | L1                                                                                                                         | 5   | 0.6  |
| N07BC | Methadone                      | Compatible.                                                                                                                                     | L2                                                                                                                         | 1   | 0.1  |
| C02AB | Methyldopa                     | Compatible.                                                                                                                                     | L2                                                                                                                         | 15  | 1.8  |
| H02AB | Methylprednisolone             | Compatible.                                                                                                                                     | L2                                                                                                                         | 3   | 0.4  |
| A03FA | Metochlopramide                | Compatible. Avoid prolonged use because of side effects to mothers. Questionable if increases milk supply.                                      | L2. Prolonged use (>4 weeks) may be accompanied by side effects to mothers. Increases milk supply when PRL levels are low. | 39  | 4.6  |
| C07AB | Metoprolol                     | Compatible.                                                                                                                                     | L2                                                                                                                         | 1   | 0.1  |
| J01XD | Metronidazole                  | Opinions vary. Avoid long term therapy. Avoid BF for 12-24h after last maternal dose. Use alternative drugs if possible.                        | L2                                                                                                                         | 224 | 26.4 |
| A02BB | Misoprostol                    | Compatible.                                                                                                                                     | L2                                                                                                                         | 6   | 0.7  |
| C07AB | Nebivolol                      | ND. Use alternative drugs.                                                                                                                      | L3. Use alternative drugs.                                                                                                 | 1   | 0.1  |
| C08CA | Nifedipine                     | Compatible.                                                                                                                                     | L2                                                                                                                         | 8   | 0.9  |

|                                                                  |                                                    |                                                                                                                             |                                                       |     |      |
|------------------------------------------------------------------|----------------------------------------------------|-----------------------------------------------------------------------------------------------------------------------------|-------------------------------------------------------|-----|------|
| J01XE                                                            | Nitrofurantoin                                     | Avoid BF when infant <8 days or G6PD deficiency. Use alternative drugs.                                                     | L2. Avoid BF when infant <1 month or G6PD deficiency. | 2   | 0.2  |
| N05AH                                                            | Olanzapine                                         | LD. Probably Compatible.                                                                                                    | L2                                                    | 1   | 0.1  |
| A02BC                                                            | Omeprazole                                         | LD. Compatible.                                                                                                             | L2                                                    | 64  | 7.6  |
| A04AA                                                            | Ondasetron                                         | LD. Compatible.                                                                                                             | L2                                                    | 2   | 0.2  |
| M03BC                                                            | Orphenadrine Citrate & Paracetamol                 | ND. Use alternative drugs.                                                                                                  | L3. Use with caution.                                 | 1   | 0.1  |
| J05AH                                                            | Oseltamivir                                        | LD. Compatible.                                                                                                             | L2                                                    | 3   | 0.4  |
| N03AF                                                            | Oxcarbazepine                                      | LD. Probably Compatible. Use with caution.                                                                                  | L3                                                    | 1   | 0.1  |
| N02BE                                                            | Paracetamol                                        | Compatible.                                                                                                                 | L1                                                    | 737 | 87   |
| N06AB                                                            | Paroxetine                                         | LD. Probably Compatible.                                                                                                    | L2                                                    | 1   | 0.1  |
| J01CAR                                                           | Piperacillin & Tazobactam                          | ND. Probably Compatible.                                                                                                    | L2                                                    | 4   | 0.5  |
| H02AB                                                            | Prednisolone                                       | Probably Compatible. In high doses, avoid BF for 4 hours. High doses may suppress lactation.                                | L2                                                    | 1   | 0.1  |
| C07AA                                                            | Propranolol                                        | Compatible.                                                                                                                 | L2                                                    | 1   | 0.1  |
| H03AB                                                            | Propylthiouracil                                   | LD. Probably Compatible (low dosage limited to 450 mg/dl). If liver toxicity is suspected, the drug should be discontinued. | L2                                                    | 2   | 0.2  |
| C09AA                                                            | Ramipril                                           | ND. Use alternative drugs.                                                                                                  | L3                                                    | 2   | 0.2  |
| A02BA                                                            | Ranitidine                                         | Use alternative drugs. Ranitidine spontaneously breaks down to a cancer-causing chemical.                                   | L2                                                    | 7   | 0.8  |
| L01FA                                                            | Rituximab                                          | LD. Probably Compatible. Use with caution during BF.                                                                        | L3                                                    | 1   | 0.1  |
| C05                                                              | Ruscus aculeatus whole, Hesperidine, Ascorbic acid | Not classified.                                                                                                             | Not classified.                                       | 1   | 0.1  |
| R03AK                                                            | Salbutamol-Albuterol Sulfate & Ipratropium Bromide | ND. Compatible.                                                                                                             | L2                                                    | 7   | 0.8  |
| A12CE                                                            | Selenium                                           | Not classified.                                                                                                             | L3                                                    | 1   | 0.1  |
| N02CC                                                            | Sumatriptan                                        | LD. Probably Compatible. Withholding BF in preterm infants might be helpful.                                                | L3                                                    | 2   | 0.2  |
| N02AX                                                            | Tramadol                                           | Probably Compatible. Caution is recommended.                                                                                | L3. Caution is recommended.                           | 114 | 13.5 |
| A05AA                                                            | Ursodeoxycholic Acid                               | Not classified.                                                                                                             | L3                                                    | 1   | 0.1  |
| J05AB                                                            | Valacyclovir                                       | LD. Compatible.                                                                                                             | L2                                                    | 2   | 0.2  |
| N03AG                                                            | Valproic Acid                                      | Probably Compatible. Monitor infant for side effects.                                                                       | L4. Neurobehavioral complications.                    | 2   | 0.2  |
| B03BA                                                            | Vitamin B12                                        | Compatible.                                                                                                                 | L1                                                    | 1   | 0.1  |
| R01AA                                                            | Xylometazoline                                     | Not classified.                                                                                                             | Not classified.                                       | 3   | 0.4  |
| BF: Breastfeeding, LD: Limited Data, ND: No Data, PRL: Prolactin |                                                    |                                                                                                                             |                                                       |     |      |

**Table S3.** Risk classification of medicines used during lactation according to Lactmed and Hale.  
(Attica/Greece 2020; N=796/847).

| ATC    | Medication                                | Lactmed                                                                                                                                                                                                                                 | Hale                                                                  | N   | %    |
|--------|-------------------------------------------|-----------------------------------------------------------------------------------------------------------------------------------------------------------------------------------------------------------------------------------------|-----------------------------------------------------------------------|-----|------|
| B01AC  | Acetylosalicylic Acid                     | Probably compatible (lowdose).                                                                                                                                                                                                          | L2                                                                    | 5   | 0.6  |
| J05AB  | Acyclovir                                 | Compatible.                                                                                                                                                                                                                             | L2                                                                    | 1   | 0.1  |
| L04AB  | Adalimumab                                | LD. Probably compatible.                                                                                                                                                                                                                | L3                                                                    | 4   | 0.5  |
| N05BA  | Alprazolam                                | LD. Probably Compatible in low dose and short-term use. Use alternative drugs.                                                                                                                                                          | L3                                                                    | 1   | 0.1  |
| A02AD  | Aluminium Hydroxide & Magnesium Hydroxide | AH: Not classified.<br>MH: Compatible.                                                                                                                                                                                                  | AH: Not classified.<br>MH: L1                                         | 2   | 0.2  |
| R05CB  | Ambroxol                                  | Not classified.                                                                                                                                                                                                                         | Not classified.                                                       | 1   | 0.1  |
| J01MB  | Amikacin                                  | Probably compatible.                                                                                                                                                                                                                    | L2                                                                    | 4   | 0.5  |
| C08CA  | Amlodipine                                | LD. Probably compatible.                                                                                                                                                                                                                | L3                                                                    | 1   | 0.1  |
| J01CA  | Amoxicillin                               | LD. Compatible.                                                                                                                                                                                                                         | L1                                                                    | 11  | 1.3  |
| J01CAR | Amoxicillin & Clavulanic Acid             | LD. Compatible.                                                                                                                                                                                                                         | L1                                                                    | 7   | 0.8  |
| J01CA  | Ampicillin                                | Compatible.                                                                                                                                                                                                                             | L1                                                                    | 7   | 0.8  |
| L04AX  | Azathioprine                              | Probably Compatible. Use with caution during BF. Avoiding BF for 4 hours markedly decreases drug levels in breast milk.                                                                                                                 | L3. Use with caution. Monitor infant for signs of immunosuppression.  | 2   | 0.2  |
| J01FA  | Azithromycin                              | Probably Compatible. Risk for infantile hypertrophic pyloric stenosis (?).                                                                                                                                                              | L2                                                                    | 2   | 0.2  |
| D07CC  | Betamethasone & Gentamycine (Topical)     | Compatible for short-term topical use. Avoid nipple area.                                                                                                                                                                               | L3                                                                    | 2   | 0.2  |
| N05BA  | Bromazepam                                | Not classified.                                                                                                                                                                                                                         | Not classified.                                                       | 1   | 0.1  |
| R05CB  | Bromhexine                                | Not classified.                                                                                                                                                                                                                         | Not classified.                                                       | 2   | 0.2  |
| R01AD  | Budesonide                                | Compatible.                                                                                                                                                                                                                             | L1                                                                    | 1   | 0.1  |
| A03D   | Butylscopolamine&Paracetamol              | Not classified.                                                                                                                                                                                                                         | Not classified.                                                       | 10  | 1.2  |
| G02CB  | Cabergolin                                | ND. Probably Compatible. Suppresses Lactation – Avoid during lactation (Women treated with cabergoline for pituitary adenomas who become pregnant can breastfed their infants with no apparent risk of hyperprolactinemia. recurrence). | L3. Careful administration in patient with                            | 2   | 0.2  |
| A12A   | Calcium Salt                              | Not classified.                                                                                                                                                                                                                         | L3                                                                    | 532 | 62.8 |
| J01DC  | Cefaclor                                  | LD. Compatible.                                                                                                                                                                                                                         | L1                                                                    | 59  | 7    |
| J01DC  | Cefoxitin                                 | Compatible.                                                                                                                                                                                                                             | L1                                                                    | 209 | 24.7 |
| J01DD  | Ceftriaxone                               | LD. Compatible.                                                                                                                                                                                                                         | L1                                                                    | 19  | 2.2  |
| J01DC  | Cefuroxime                                | LD. Probably compatible.                                                                                                                                                                                                                | L2                                                                    | 317 | 37.4 |
| R06AE  | Cetirizine                                | Compatible. High doses may decrease milk supply.                                                                                                                                                                                        | L2                                                                    | 1   | 0.1  |
| A02BA  | Cimetidine                                | LD. Probably Compatible for infants >2 months— Use alternative drugs (potential for causing hepatic enzyme inhibition).                                                                                                                 | L1. Compatible for short-term use. Use alternative drugs if possible. | 3   | 0.4  |
| J01MA  | Ciprofloxacin                             | Probably Compatible. Avoiding BF for 3-4 hours decreases the exposure.                                                                                                                                                                  | L3. Use alternative drugs if possible.                                | 4   | 0.5  |

|       |                                  |                                                                                                                                                 |                                                                             |     |      |
|-------|----------------------------------|-------------------------------------------------------------------------------------------------------------------------------------------------|-----------------------------------------------------------------------------|-----|------|
| J01FA | Clarithromycin                   | Probably Compatible. Risk for infantile hypertrophic pyloric stenosis (?).                                                                      | L1                                                                          | 6   | 0.7  |
| J01FF | Clindamycin                      | Probably Compatible. Use alternative drugs if possible.                                                                                         | L2                                                                          | 2   | 0.2  |
| M01AB | Diclofenac                       | LD. Probably Compatible.                                                                                                                        | L2                                                                          | 634 | 74.9 |
| R01AD | Dexamethasone (Topical)          | ND. Probably Compatible.                                                                                                                        | L3                                                                          | 3   | 0.4  |
| R06AB | Dimethindene                     | Not classified.                                                                                                                                 | Not classified.                                                             | 3   | 0.4  |
| J01AA | Doxycycline                      | Compatible in short-term use. Avoid prolonged use.                                                                                              | L3. Avoid prolonged use >21 days (dental staining or decrease bone growth). | 1   | 0.1  |
| G03AA | Drospirenone&Ethinyles triadiol  | Not classified.                                                                                                                                 | L3. May suppress lactation.                                                 | 3   | 0.4  |
| G02AB | Ergometrine or Ergonovin Maleate | Avoid in breastfeeding mothers. Lowers PRL, decreases BF rates.                                                                                 | L3. Avoid prolonged use, may suppress lactation.                            | 511 | 60.3 |
| J01FA | Erythromycin                     | Probably Compatible. Risk for infantile hypertrophic pyloric stenosis (?).                                                                      | L3. Risk for infantile hypertrophic pyloric stenosis (?).                   | 2   | 0.2  |
| M01AH | Etoricoxib                       | Not classified.                                                                                                                                 | Not classified.                                                             | 1   | 0.1  |
| N01AH | Fentanyl                         | LD. Probably Compatible (low dose).                                                                                                             | L2                                                                          | 593 | 70   |
| G01AF | Fenticonazole                    | Not classified.                                                                                                                                 | Not classified.                                                             | 2   | 0.2  |
| B03A  | Ferrous Sulfate                  | Compatible.                                                                                                                                     | L1                                                                          | 609 | 71.9 |
| H02AA | Fludrocortisone                  | Not classified.                                                                                                                                 | L3                                                                          | 3   | 0.4  |
| B03BB | Folic Acid                       | Not classified.                                                                                                                                 | L1                                                                          | 45  | 5.3  |
| V08CA | Gadobutrol                       | LD. Probably Compatible. Use alternative agents with published experience.                                                                      | L3                                                                          | 1   | 0.1  |
| J01MB | Gentamicin                       | LD. Probably Compatible.                                                                                                                        | L2                                                                          | 15  | 1.8  |
| S01CA | Gentamicin & Dexamethasone       | LD. Probably Compatible.                                                                                                                        | Not classified.                                                             | 1   | 0.1  |
| B01AB | Heparin (low molecular weight)   | ND. Probably Compatible.                                                                                                                        | L2                                                                          | 442 | 52.2 |
| H02AB | Hydrocortisone                   | ND. Use alternative drugs.                                                                                                                      | L3. Low dosages, short-term use.                                            | 10  | 1.2  |
| P01BA | Hydroxychloroquine               | LD. Probably Compatible.                                                                                                                        | L2                                                                          | 2   | 0.2  |
| N05BB | Hydroxyzine                      | LD. Compatible in small doses. Larger doses or prolonged use may cause drowsiness to the infant or decrease milk supply. Use alternative drugs. | L2                                                                          | 1   | 0.1  |
| L04AB | Infliximab                       | LD. Probably Compatible.                                                                                                                        | L3                                                                          | 3   | 0.4  |
| J07BB | Influenza virus vaccines         | Compatible.                                                                                                                                     | L1                                                                          | 2   | 0.2  |
| A10AE | Insulin                          | Compatible.                                                                                                                                     | L2                                                                          | 3   | 0.4  |
| C07AG | Labetalol                        | LD. Probably Compatible. Use alternative drugs for preterm infant.                                                                              | L2                                                                          | 2   | 0.2  |
| A06AD | Lactulose                        | Not classified.                                                                                                                                 | L3                                                                          | 11  | 1.3  |
| R06AE | Levocetirizine                   | LD. Probably Compatible. High doses may decrease milk supply.                                                                                   | L2                                                                          | 4   | 0.5  |
| H03AA | Levothyroxine                    | LD. Compatible.                                                                                                                                 | L1                                                                          | 184 | 21.7 |
| N01BB | Lidocaine                        | Compatible.                                                                                                                                     | L2                                                                          | 44  | 5.2  |

|        |                                                    |                                                                                                                             |                                                                                                                            |     |      |
|--------|----------------------------------------------------|-----------------------------------------------------------------------------------------------------------------------------|----------------------------------------------------------------------------------------------------------------------------|-----|------|
| M01AC  | Lornoxicam                                         | Not classified.                                                                                                             | Not classified.                                                                                                            | 59  | 7.0  |
| A12CC  | Magnesium Aspartate                                | ND. Probably Compatible.                                                                                                    | Not classified.                                                                                                            | 20  | 2.4  |
| N02AB  | Meperidine                                         | LD. Infant's sedation. Use alternative drugs.                                                                               | L4                                                                                                                         | 6   | 0.7  |
| J01DH  | Meropenem                                          | ND. Probably Compatible.                                                                                                    | L3                                                                                                                         | 1   | 0.1  |
| A07EC  | Mesalamine                                         | Not classified.                                                                                                             | L3                                                                                                                         | 1   | 0.1  |
| A10BA  | Metformin                                          | Compatible. Use with caution in newborn, preterm infants and those with renal impairment.                                   | L1                                                                                                                         | 5   | 0.6  |
| C02AB  | Methyldopa                                         | Compatible.                                                                                                                 | L2                                                                                                                         | 13  | 1.5  |
| H02AB  | Methylprednisolone                                 | Compatible.                                                                                                                 | L2                                                                                                                         | 2   | 0.2  |
| A03FA  | Metochlopramide                                    | Compatible. Avoid prolonged use because of side effects to mothers. Questionable if increases milk supply.                  | L2. Prolonged use (>4 weeks) may be accompanied by side effects to mothers. Increases milk supply when PRL levels are low. | 37  | 4.4  |
| C07AB  | Metoprolol                                         | Compatible.                                                                                                                 | L2                                                                                                                         | 1   | 0.1  |
| J01XD  | Metronidazole                                      | Opinions vary. Avoid long term therapy. Avoid BF for 12-24h after last maternal dose. Use alternative drugs if possible.    | L2                                                                                                                         | 204 | 24.1 |
| A02BB  | Misoprostol                                        | Compatible.                                                                                                                 | L2                                                                                                                         | 6   | 0.7  |
| C08CA  | Nifedipine                                         | Compatible.                                                                                                                 | L2                                                                                                                         | 7   | 0.8  |
| J01XE  | Nitrofurantoin                                     | Avoid in BF when infant <8 days or G6PD deficiency. Use alternative drugs.                                                  | L2. Avoid in BF when infant <1 month or G6PD deficiency.                                                                   | 1   | 0.1  |
| A02BC  | Omeprazole                                         | LD. Compatible.                                                                                                             | L2                                                                                                                         | 59  | 7    |
| A04AA  | Ondasetron                                         | LD. Compatible.                                                                                                             | L2                                                                                                                         | 2   | 0.2  |
| M03BC  | Orphenadrine Citrate & Paracetamol                 | ND. Use alternative drugs.                                                                                                  | L3. Use with caution.                                                                                                      | 1   | 0.1  |
| J05AH  | Oseltamivir                                        | LD. Compatible.                                                                                                             | L2                                                                                                                         | 1   | 0.1  |
| N02BE  | Paracetamol                                        | Compatible.                                                                                                                 | L1                                                                                                                         | 695 | 82   |
| J01CAR | Piperacillin & Tazobactam                          | ND. Probably Compatible.                                                                                                    | L2                                                                                                                         | 3   | 0.4  |
| C07AA  | Propranolol                                        | Compatible.                                                                                                                 | L2                                                                                                                         | 1   | 0.1  |
| H03AB  | Propylthiouracil                                   | LD. Probably Compatible (low dosage limited to 450 mg/dl). If liver toxicity is suspected, the drug should be discontinued. | L2                                                                                                                         | 1   | 0.1  |
| C09AA  | Ramipril                                           | ND. Use alternative drugs.                                                                                                  | L3                                                                                                                         | 2   | 0.2  |
| A02BA  | Ranitidine                                         | Use alternative drugs. Ranitidine spontaneously breaks down to a cancer-causing chemical.                                   | L2                                                                                                                         | 7   | 0.8  |
| C05    | Ruscus aculeatus whole, Hesperidine, Ascorbic acid | Not classified.                                                                                                             | Not classified.                                                                                                            | 1   | 0.1  |
| R03AK  | Salbutamol-Albuterol Sulfate & Ipratropium Bromide | ND. Compatible.                                                                                                             | L2                                                                                                                         | 5   | 0.6  |
| A12CE  | Selenium                                           | Not classified.                                                                                                             | L3                                                                                                                         | 1   | 0.1  |



|                                                                  |                |                                                                                         |                             |     |      |
|------------------------------------------------------------------|----------------|-----------------------------------------------------------------------------------------|-----------------------------|-----|------|
| N02CC                                                            | Sumatriptan    | LD. Probably Compatible. Withholding breastfeeding in preterm infants might be helpful. | L3                          | 1   | 0.1  |
| N02AX                                                            | Tramadole      | Probably Compatible. Caution is recommended.                                            | L3. Caution is recommended. | 106 | 12.5 |
| J05AB                                                            | Valacyclovir   | LD. Compatible.                                                                         | L2                          | 1   | 0.1  |
| B03BA                                                            | Vitamin B12    | Compatible.                                                                             | L1                          | 1   | 0.1  |
| R01AA                                                            | Xylometazoline | Not classified.                                                                         | Not classified.             | 3   | 0.4  |
| BF: Breastfeeding, LD: Limited Data, ND: No Data, PRL: Prolactin |                |                                                                                         |                             |     |      |

**Table S4.** Cases of breastfeeding cessation due to medication intake and professional counseling.  
(Attica/Greece 2020; N= 57/847).

| Case | BF duration | Reason for Medication Intake | Medicines                      | Compatibility with breastfeeding                                                                                                                                                                                                                                                                                                                                  | Recommendation and Decision for BF cessation                                        | Counseling                                                                                                                        |
|------|-------------|------------------------------|--------------------------------|-------------------------------------------------------------------------------------------------------------------------------------------------------------------------------------------------------------------------------------------------------------------------------------------------------------------------------------------------------------------|-------------------------------------------------------------------------------------|-----------------------------------------------------------------------------------------------------------------------------------|
| 1    | 4 days      | Depression                   | Escitalopram                   | <b>Lactmed:</b> LD. Probably Compatible.<br><b>Hale:</b> L2                                                                                                                                                                                                                                                                                                       | Pediatrician recommended continuation of BF. Maternal decision.*                    | Evidence-based counseling.                                                                                                        |
| 2    | 0 days      | Depression                   | Escitalopram<br><br>Alprazolam | <b>Lactmed:</b> LD. Probably Compatible.<br><b>Hale:</b> L2<br><br><b>Lactmed:</b> LD. Probably Compatible in low dose and short-term use. Use alternative drugs (e.g., midazolam, oxazepam).<br><b>Hale:</b> L3                                                                                                                                                  | Obstetrician's advice. Informed choice.**                                           | Erroneous counseling. The HP could have advised the mother to take measures to minimize the infant's exposure.                    |
| 3    | 15 days     | Depression                   | Escitalopram                   | <b>Lactmed:</b> LD. Probably Compatible.<br><b>Hale:</b> L2                                                                                                                                                                                                                                                                                                       | Pediatrician recommended continuation of BF. Maternal decision.                     | Evidence-based counseling.                                                                                                        |
| 4    | 0 days      | Depression                   | Escitalopram                   | <b>Lactmed:</b> LD. Probably Compatible.<br><b>Hale:</b> L2                                                                                                                                                                                                                                                                                                       | Neurologist recommended continuation of BF. Maternal decision.                      | Evidence-based counseling.                                                                                                        |
| 5    | 0 days      | Tachycardia<br>Depression    | Nebivolol<br><br>Bromazepam    | <b>Lactmed:</b> ND. Use alternative drugs.<br><b>Hale:</b> L3. Use alternative drugs (e.g., metoprolol, labetalol).<br><br><b>Lactmed:</b> Not classified.<br><b>Hale:</b> Not classified. Note: Bromazepam's pharmacokinetic data makes it possible to pass into breast milk in significant amounts. Use alternative drugs (e.g., lormetazepam, temazepam) [37]. | Obstetrician's advice. Informed choice.                                             | Erroneous counseling. The HP could have advised the mother to take measures to minimize the infant's exposure. (e.g., milk bank). |
| 6    | 20 days     | Postpartum Depression        | Fluoxetine                     | <b>Lactmed:</b> LD. Probably Compatible. Use alternative drugs if possible (e.g., sertraline, escitalopram).<br><b>Hale:</b> L2. Use alternative drugs if possible.                                                                                                                                                                                               | Neurologist's advice. Obstetrician and Pediatrician in accordance. Informed choice. | Erroneous counseling. The HP could have advised the mother to take measures to minimize the infant's exposure.                    |

|    |         |                              |                          |                                                                                                                                                                                                                                   |                                                                             |                                                                                                                |
|----|---------|------------------------------|--------------------------|-----------------------------------------------------------------------------------------------------------------------------------------------------------------------------------------------------------------------------------|-----------------------------------------------------------------------------|----------------------------------------------------------------------------------------------------------------|
|    |         |                              |                          |                                                                                                                                                                                                                                   |                                                                             | [e.g., use the medicine when breastfeeding older infants (4-6 months of age)].                                 |
| 7  | 60 days | Postpartum depression        | Paroxetine               | <b>Lactmed:</b> LD. Probably Compatible.<br><b>Hale:</b> L2                                                                                                                                                                       | Pediatrician's advice (IBCLC)/<br>[Infant neutropenia].<br>Informed choice. | Evidence-based counseling due to the onset of adverse side effects in the infant.                              |
| 8  | 40 days | Postpartum depression        | Aripiprazole             | <b>Lactmed:</b> LD. Probably Compatible in low doses. Use alternative drugs if possible (e.g., olanzapine, risperidone). May suppress lactation.<br><b>Hale:</b> L3. May suppress lactation.                                      | Psychiatrist's advice.<br>Informed choice.                                  | Erroneous counseling. The HP could have advised the mother to take measures to minimize the infant's exposure. |
| 9  | 60 days | Postpartum depression        | Olanzapine<br>Citalopram | <b>Lactmed:</b> LD. Probably Compatible<br><b>Hale:</b> L2<br><b>Lactmed:</b> LD. Probably Compatible. Use alternative drugs if possible (e.g., sertraline, escitalopram).<br><b>Hale:</b> L2. Use alternative drugs if possible. | Neurologist's advice.<br>Informed choice.                                   | Erroneous counseling. The HP could have advised the mother to take measures to minimize the infant's exposure. |
| 10 | 0 days  | Generalized anxiety disorder | Escitalopram             | <b>Lactmed:</b> LD. Probably Compatible.<br><b>Hale:</b> L2                                                                                                                                                                       | Neurologist's advice.<br>Informed choice.                                   | Erroneous counseling due to compatibility of the medicine with BF.                                             |
| 11 | 7 days  | Panic disorder               | Escitalopram             | <b>Lactmed:</b> LD. Probably Compatible.<br><b>Hale:</b> L2                                                                                                                                                                       | Neurologist's advice.<br>Informed choice.                                   | Erroneous counseling due to compatibility of the medicine with BF.                                             |
| 12 | 0 days  | Bipolar disorder             | Aripiprazole             | <b>Lactmed:</b> LD. Probably Compatible in low doses. Use alternative drugs if possible (e.g., olanzapine, risperidone). May suppress lactation.<br><b>Hale:</b> L3. May suppress lactation.                                      | Neurologist's advice.<br>Obstetrician in accordance.<br>Informed choice.    | Erroneous counseling. The HP could have advised the mother to take measures to minimize the infant's exposure. |
| 13 | 0 days  | Epilepsy                     | Carbamazepine            | <b>Lactmed:</b> LD. Probably compatible.<br><b>Hale:</b> L2                                                                                                                                                                       | Neurologist's advice.<br>Obstetrician in accordance.<br>Informed choice.    | Erroneous counseling due to compatibility of the medicine with BF.                                             |

|    |          |                    |                              |                                                                                                                                                                                              |                                                                                                                          |                                                                                                                |
|----|----------|--------------------|------------------------------|----------------------------------------------------------------------------------------------------------------------------------------------------------------------------------------------|--------------------------------------------------------------------------------------------------------------------------|----------------------------------------------------------------------------------------------------------------|
| 14 | 0 days   | Epilepsy           | Valproic Acid                | <b>Lactmed:</b> Probably Compatible. Monitor infant for side effects.<br><b>Hale:</b> L4.<br>Neurobehavioral complications.                                                                  | Neurologist's/<br>Obstetrician's advice.<br>Informed choice.                                                             | Evidence-based counseling.                                                                                     |
| 15 | 0 days   | Epilepsy           | Lamotrigine<br>Clonazepam    | <b>Lactmed:</b> Compatible.<br><b>Hale:</b> L2<br><b>Lactmed:</b> Compatible to use cautiously. Use alternative drugs if possible (long half-life) (e.g., carbamazepine).<br><b>Hale:</b> L3 | Neurologist's advice.<br>Obstetrician and Pediatrician in accordance.<br>Informed choice.                                | Erroneous counseling. The HP could have advised the mother to take measures to minimize the infant's exposure. |
| 16 | 0 days   | Epilepsy           | Lamotrigine<br>Levetiracetam | <b>Lactmed:</b> Compatible<br><b>Hale:</b> L2<br><b>Lactmed:</b> Probably Compatible. Might reduce milk supply.<br><b>Hale:</b> L2                                                           | Obstetrician's advice.<br>Informed choice.                                                                               | Erroneous counseling due to compatibility of the medicines with BF.                                            |
| 17 | 0 days   | Epilepsy           | Oxcarbazepine                | <b>Lactmed:</b> LD. Probably Compatible. Use with caution (Alternatives: e.g., carbamazepine).<br><b>Hale:</b> L3                                                                            | Neurologist's advice.<br>Obstetrician in accordance.<br>Informed choice.                                                 | Erroneous counseling. The HP could have advised the mother to take measures to minimize the infant's exposure. |
| 18 | 0 days   | Multiple Sclerosis | Dimethyl fumarate            | <b>Lactmed:</b> LD. Probably Compatible.<br><b>Hale:</b> L2                                                                                                                                  | Neurologist's advice.<br>Informed choice.                                                                                | Erroneous counseling due to compatibility of the medicine with BF.                                             |
| 19 | 0 days   | Multiple Sclerosis | Fingolimod                   | <b>Lactmed:</b> Avoid during breastfeeding. Potential toxicity to the infant.<br><b>Hale:</b> L5                                                                                             | Neurologist's advice.<br>Informed choice.                                                                                | Evidence-based counseling.                                                                                     |
| 20 | 0 days   | Multiple Sclerosis | Fingolimod                   | <b>Lactmed:</b> Avoid during breastfeeding. Potential toxicity to the infant.<br><b>Hale:</b> L5                                                                                             | Neurologist's/<br>Obstetrician's advice.<br>Informed choice.                                                             | Evidence-based counseling.                                                                                     |
| 21 | 180 days | Multiple sclerosis | Alemtuzumab                  | <b>Lactmed:</b> ND. Use with caution or avoid, especially while nursing a newborn or preterm infant.<br><b>Hale:</b> L4                                                                      | Neurologist's advice.<br>Obstetrician in accordance.<br>Informed choice.<br>[Delayed the therapy in order to breastfeed] | Evidence-based counseling.                                                                                     |
| 22 | 150 days | Multiple sclerosis | Dimethyl fumarate            | <b>Lactmed:</b> LD. Probably Compatible<br><b>Hale:</b> L2                                                                                                                                   | Neurologist's advice.<br>Informed choice.                                                                                | Erroneous counseling due to compatibility of the medicine with BF.                                             |

|    |          |                              |                                                                  |                                                                                                                                                                                                                                                          |                                                                                                                  |                                                                                                                                                                                                                                                                                                                  |
|----|----------|------------------------------|------------------------------------------------------------------|----------------------------------------------------------------------------------------------------------------------------------------------------------------------------------------------------------------------------------------------------------|------------------------------------------------------------------------------------------------------------------|------------------------------------------------------------------------------------------------------------------------------------------------------------------------------------------------------------------------------------------------------------------------------------------------------------------|
| 23 | 0 days   | Crohn's disease              | Azathioprine                                                     | <p><b>Lactmed:</b> Probably Compatible. Use with caution during BF (Alternatives: e.g., infliximab, budesonide). Avoiding BF for 4 hours markedly decreases drug levels in breast milk.</p> <p><b>Hale:</b> L3</p>                                       | Gastroenterologist's/Obstetrician's/Pediatrician's advice. Informed choice.                                      | <p>Erroneous counseling. The HP could have advised the mother to take measures to minimize the infant's exposure. [e.g., administer the maternal dose after BF and before the infant's longest sleep; avoid BF or discard breast milk for a certain period of time (e.g., 4 hours) after the maternal dose].</p> |
| 24 | 3 days   | Sjorgen syndrome             | Hydroxychloroquine                                               | <p><b>Lactmed:</b> LD. Probably Compatible.</p> <p><b>Hale:</b> L2</p>                                                                                                                                                                                   | Rheumatologist's advice. Obstetrician/Pediatrician in accordance. Informed choice.                               | Erroneous counseling due to compatibility of the medicine with BF.                                                                                                                                                                                                                                               |
| 25 | 0 days   | Systemic lupus erythematosus | Hydroxychloroquine<br>Methylprednisolone (8 mg/day)              | <p><b>Lactmed:</b> LD. Probably Compatible</p> <p><b>Hale:</b> L2</p> <p><b>Lactmed:</b> Compatible</p> <p><b>Hale:</b> L2</p>                                                                                                                           | Obstetrician/pediatrician informed her that high doses of cortisone are incompatible with BF. Maternal decision. | Erroneous counseling due to drug dose compatibility with BF.                                                                                                                                                                                                                                                     |
| 26 | 30 days  | Cushing disease              | Fludrocortisone<br>Hydrocortisone (6.7mg/day)<br>Magnesium Oxide | <p><b>Lactmed:</b> Not classified.</p> <p><b>Hale:</b> L3</p> <p><b>Lactmed:</b> ND. Use alternative drugs.</p> <p><b>Hale:</b> L3. Low dosages, short-term use.</p> <p><b>Lactmed:</b> ND. Probably Compatible.</p> <p><b>Hale:</b> Not classified.</p> | Obstetrician's advice. Informed choice.                                                                          | <p>Erroneous counseling. The HP could have advised the mother to take measures to minimize the infant's exposure. [e.g., administer the maternal dose after BF and before the infant's longest sleep; avoid BF or discard breast milk for a certain period of time (e.g., 4 hours) after the maternal dose].</p> |
| 27 | 135 days | Diabetes                     | Metformin                                                        | <p><b>Lactmed:</b> Compatible. Use with caution in newborn, preterm infants and those with renal impairment.</p>                                                                                                                                         | Endocrinologist's advice. Informed choice.                                                                       | Erroneous counseling due to compatibility of the medicine with BF.                                                                                                                                                                                                                                               |

|    |         |                      |                               |                                                                                                                                                                                           |                                                                                                    |                                                                                                                                                                                                                                                                                                           |
|----|---------|----------------------|-------------------------------|-------------------------------------------------------------------------------------------------------------------------------------------------------------------------------------------|----------------------------------------------------------------------------------------------------|-----------------------------------------------------------------------------------------------------------------------------------------------------------------------------------------------------------------------------------------------------------------------------------------------------------|
|    |         |                      |                               | <b>Hale: L1</b>                                                                                                                                                                           |                                                                                                    |                                                                                                                                                                                                                                                                                                           |
| 28 | 0 days  | Hyperthyroidism      | Propylthiouracil              | <b>Lactmed:</b> LD. Probably Compatible (low dosage limited to 450 mg/dl). If liver toxicity is suspected, the drug should be discontinued.                                               | Endocrinologist's advice.<br>Obstetrician in accordance.<br>Informed choice.                       | Erroneous counseling due to compatibility of the medicine with BF.                                                                                                                                                                                                                                        |
|    |         |                      |                               | <b>Hale: L2</b>                                                                                                                                                                           |                                                                                                    |                                                                                                                                                                                                                                                                                                           |
| 29 | 20 days | Mastitis             | Amoxicillin & Clavulanic Acid | <b>Lactmed:</b> LD. Compatible.<br><b>Hale:</b> L1                                                                                                                                        | Obstetrician's advice to discard breast milk.<br>Maternal decision to cease due to milk reduction. | Erroneous counseling due to compatibility of the medicines with BF.                                                                                                                                                                                                                                       |
|    |         |                      | Diclofenac                    | <b>Lactmed:</b> LD. Probably Compatible.<br><b>Hale:</b> L2                                                                                                                               |                                                                                                    |                                                                                                                                                                                                                                                                                                           |
|    |         |                      |                               | <b>Hale: L1</b>                                                                                                                                                                           |                                                                                                    |                                                                                                                                                                                                                                                                                                           |
| 30 | 7 days  | Mastitis             | Amoxicillin & Clavulanic Acid | <b>Lactmed:</b> LD. Compatible.<br><b>Hale:</b> L1                                                                                                                                        | Obstetrician's advice.<br>Informed decision.                                                       | Erroneous counseling. The HP could have advised the mother to take measures to minimize the infant's exposure.                                                                                                                                                                                            |
|    |         |                      | Metronidazole                 | <b>Lactmed:</b> Opinions vary. Avoid long term therapy. Avoid BF for 12-24h after last maternal dose. Use alternative drugs if possible.<br><b>Hale:</b> L2                               |                                                                                                    |                                                                                                                                                                                                                                                                                                           |
|    |         |                      |                               | <b>Hale: L1</b>                                                                                                                                                                           |                                                                                                    |                                                                                                                                                                                                                                                                                                           |
| 31 | 40 days | Mastitis             | Cefaclor                      | <b>Lactmed:</b> LD. Compatible.<br><b>Hale:</b> L1                                                                                                                                        | Mammologist's advice.<br>Informed choice.                                                          | Erroneous counseling. The HP could have advised the mother to take measures to minimize the infant's exposure. [e.g., administer the maternal dose after BF and before the infant's longest sleep; avoid BF or discard breast milk for a certain period of time (e.g., 4 hours) after the maternal dose]. |
|    |         |                      | Ciprofloxacin                 | <b>Lactmed:</b> Probably Compatible. Avoiding BF for 3-4 hours decreases the exposure.<br><b>Hale:</b> L3. Use alternative drugs if possible (e.g., amoxicilline, cephalixin, ofloxacin). |                                                                                                    |                                                                                                                                                                                                                                                                                                           |
|    |         |                      |                               | <b>Hale: L1</b>                                                                                                                                                                           |                                                                                                    |                                                                                                                                                                                                                                                                                                           |
| 32 | 30 days | Postpartum infection | Cefoxitin                     | <b>Lactmed:</b> Compatible.<br><b>Hale:</b> L1                                                                                                                                            | Obstetrician's advice.<br>Informed choice.                                                         | Erroneous counseling. The HP could have advised the mother to take measures to minimize the infant's exposure.                                                                                                                                                                                            |
|    |         |                      | Metronidazole                 | <b>Lactmed:</b> Opinions vary. Avoid long term therapy. Avoid BF for 12-24h after last maternal dose. Use                                                                                 |                                                                                                    |                                                                                                                                                                                                                                                                                                           |

|    |         |                             |                       |                                                                                                                                                                |                                                                       |                                                                                                                |
|----|---------|-----------------------------|-----------------------|----------------------------------------------------------------------------------------------------------------------------------------------------------------|-----------------------------------------------------------------------|----------------------------------------------------------------------------------------------------------------|
|    |         |                             |                       | alternative drugs if possible.<br><b>Hale:</b> L2                                                                                                              |                                                                       |                                                                                                                |
|    |         |                             | Doxycycline (10 days) | <b>Lactmed:</b> Compatible in short-term use. Avoid prolonged use.<br><b>Hale:</b> L3. Avoid prolonged use >21 days (dental staining or decrease bone growth). |                                                                       |                                                                                                                |
|    |         |                             | Cefuroxime            | <b>Lactmed:</b> LD. Probably compatible.<br><b>Hale:</b> L2                                                                                                    |                                                                       |                                                                                                                |
| 33 | 4 days  | Postpartum infection        | Metronidazole         | <b>Lactmed:</b> Opinions vary. Avoid long term therapy. Avoid BF for 12-24h after last maternal dose. Use alternative drugs if possible.<br><b>Hale:</b> L2    | Obstetrician's advice. Informed decision.                             | Erroneous counseling. The HP could have advised the mother to take measures to minimize the infant's exposure. |
|    |         |                             | Doxycycline (10 days) | <b>Lactmed:</b> Compatible in short-term use. Avoid prolonged use.<br><b>Hale:</b> L3. Avoid prolonged use >21 days (dental staining or decrease bone growth). | The pediatrician recommended her relactation, but the mother refused. |                                                                                                                |
|    |         |                             | Cefuroxime            | <b>Lactmed:</b> LD. Probably compatible.<br><b>Hale:</b> L2                                                                                                    |                                                                       |                                                                                                                |
| 34 | 40 days | Endometritis                | Metronidazole         | <b>Lactmed:</b> Opinions vary. Avoid long term therapy. Avoid BF for 12-24h after last maternal dose. Use alternative drugs if possible.<br><b>Hale:</b> L2    | Obstetrician's advice. Informed choice.                               | Erroneous counseling. The HP could have advised the mother to take measures to minimize the infant's exposure. |
|    |         |                             | Amikacin              | <b>Lactmed:</b> Probably compatible.<br><b>Hale:</b> L2                                                                                                        |                                                                       |                                                                                                                |
| 35 | 0 days  | Respiratory tract infection | Ceftriaxone           | <b>Lactmed:</b> LD. Compatible.<br><b>Hale:</b> L1                                                                                                             | Obstetrician's advice. Informed choice.                               | Erroneous counseling due to compatibility of the medicines with BF.                                            |
|    |         |                             | Azithromycin          | <b>Lactmed:</b> Probably Compatible. Risk for                                                                                                                  |                                                                       |                                                                                                                |

|    |         |                         |                                                    |                                                                                                                                                                                           |                                                               |                                                                                                                                                                                                                                                                                                           |
|----|---------|-------------------------|----------------------------------------------------|-------------------------------------------------------------------------------------------------------------------------------------------------------------------------------------------|---------------------------------------------------------------|-----------------------------------------------------------------------------------------------------------------------------------------------------------------------------------------------------------------------------------------------------------------------------------------------------------|
|    |         |                         | Salbutamol-Albuterol Sulfate & Ipratropium Bromide | infantile hypertrophic pyloric stenosis (?).<br><b>Hale:</b> L2<br><b>Lactmed:</b> ND. Compatible.<br><b>Hale:</b> L2                                                                     |                                                               | Note: Ambroxol is a mucolytic of choice, widely used and well tolerated during BF [37].                                                                                                                                                                                                                   |
|    |         |                         | Budesonide                                         |                                                                                                                                                                                           |                                                               |                                                                                                                                                                                                                                                                                                           |
|    |         |                         | Ambroxol                                           | <b>Lactmed:</b> Compatible.<br><b>Hale:</b> L1                                                                                                                                            |                                                               |                                                                                                                                                                                                                                                                                                           |
|    |         |                         |                                                    | <b>Lactmed:</b> Not classified.<br><b>Hale:</b> Not classified.                                                                                                                           |                                                               |                                                                                                                                                                                                                                                                                                           |
| 36 | 15 days | Pyelonephritis          | Ciprofloxacin                                      | <b>Lactmed:</b> Probably Compatible. Avoiding BF for 3-4 hours decreases the exposure.<br><b>Hale:</b> L3. Use alternative drugs if possible (e.g., amoxicilline, cephalixin, ofloxacin). | Obstetrician's/<br>Pediatrician's advice.<br>Informed choice. | Erroneous counseling. The HP could have advised the mother to take measures to minimize the infant's exposure. [e.g., administer the maternal dose after BF and before the infant's longest sleep; avoid BF or discard breast milk for a certain period of time (e.g., 4 hours) after the maternal dose]. |
| 37 | 60 days | Pyelonephritis          | Ciprofloxacin                                      | <b>Lactmed:</b> Probably Compatible. Avoiding BF for 3-4 hours decreases the exposure.<br><b>Hale:</b> L3. Use alternative drugs if possible (e.g., amoxicilline, cephalixin, ofloxacin). | Obstetrician's advice.<br>Informed choice.                    | Erroneous counseling. The HP could have advised the mother to take measures to minimize the infant's exposure. [e.g., administer the maternal dose after BF and before the infant's longest sleep; avoid BF or discard breast milk for a certain period of time (e.g., 4 hours) after the maternal dose]. |
|    |         |                         | Amoxicillin & Clavulanic Acid                      | <b>Lactmed:</b> LD. Compatible<br><b>Hale:</b> L1                                                                                                                                         |                                                               |                                                                                                                                                                                                                                                                                                           |
|    |         |                         | Cefoxitin                                          | <b>Lactmed:</b> Compatible<br><b>Hale:</b> L1                                                                                                                                             |                                                               |                                                                                                                                                                                                                                                                                                           |
| 38 | 4 days  | Urinary tract infection | Ciprofloxacin                                      | <b>Lactmed:</b> Probably Compatible. Avoiding BF                                                                                                                                          | Obstetrician recommended                                      | Evidence-based counseling.                                                                                                                                                                                                                                                                                |



|    |          |                               |                                      |                                                                                                                                                                                                            |                                                                                                              |                                                                                                                                                                                            |
|----|----------|-------------------------------|--------------------------------------|------------------------------------------------------------------------------------------------------------------------------------------------------------------------------------------------------------|--------------------------------------------------------------------------------------------------------------|--------------------------------------------------------------------------------------------------------------------------------------------------------------------------------------------|
|    |          |                               |                                      | for 3-4 hours decreases the exposure.<br><b>Hale:</b> L3. Use alternative drugs if possible.                                                                                                               | discarding the breast milk.<br>Maternal decision to cease due to milk reduction.                             |                                                                                                                                                                                            |
| 39 | 150 days | Conjunctivitis                | Gentamicin & Dexamethasone (Topical) | <b>Lactmed:</b> LD. Probably Compatible.<br><b>Hale:</b> Not classified.                                                                                                                                   | Pediatrician recommended discarding the breast milk.<br>Maternal decision to cease BF due to milk reduction. | Erroneous counseling due to compatibility of the medicine with BF.                                                                                                                         |
| 40 | 60 days  | Ulcerative colitis            | Azathioprine                         | <b>Lactmed:</b> Probably Compatible. Use with caution during BF (Alternatives: e.g., infliximab, budesonide).<br>Avoiding BF for 4 hours markedly decreases drug levels in breast milk.<br><b>Hale:</b> L3 | Gastroenterologist's advice.                                                                                 | Erroneous counseling. The HP could have advised the mother to take measures to minimize the infant's exposure.                                                                             |
|    |          |                               | Infliximab                           | <b>Lactmed:</b> LD. Probably Compatible.<br><b>Hale:</b> L3                                                                                                                                                | Pediatrician in accordance.<br>Informed choice.                                                              | [e.g., administer the maternal dose after BF and before the infant's longest sleep; avoid BF or discard breast milk for a certain period of time (e.g., 4 hours) after the maternal dose]. |
|    |          |                               | Prednisolone (40mg/day)              | <b>Lactmed:</b> Probably Compatible. In high doses (>40 mg/day), avoid BF for 4 hours.<br>High doses may suppress lactation.<br><b>Hale:</b> L2                                                            |                                                                                                              |                                                                                                                                                                                            |
| 41 | 20 days  | Purulent drainage from wounds | Ciprofloxacin                        | <b>Lactmed:</b> Probably Compatible. Avoiding BF for 3-4 hours decreases the exposure.<br><b>Hale:</b> L3. Use alternative drugs if possible.                                                              | Obstetrician's advice to discard breast milk.                                                                | Evidence-based counseling.                                                                                                                                                                 |
|    |          |                               | Metronidazole                        | <b>Lactmed:</b> Opinions vary. Avoid long term therapy. Avoid BF for 12-24h after last maternal dose. Use alternative drugs if possible.<br><b>Hale:</b> L2                                                | Maternal decision.                                                                                           |                                                                                                                                                                                            |
|    |          |                               | Amoxicillin                          | <b>Lactmed:</b> LD. Compatible.<br><b>Hale:</b> L1                                                                                                                                                         |                                                                                                              |                                                                                                                                                                                            |

|    |          |                                                                   |                                |                                                                                                                                                                |                                                                                                              |                                                                     |
|----|----------|-------------------------------------------------------------------|--------------------------------|----------------------------------------------------------------------------------------------------------------------------------------------------------------|--------------------------------------------------------------------------------------------------------------|---------------------------------------------------------------------|
| 42 | 9 days   | Purulent drainage from wounds                                     | Clindamycin                    | <b>Lactmed:</b> Probably Compatible. Use alternative drugs if possible.<br><b>Hale:</b> L2. LD. Probably Compatible.                                           | Maternal decision.                                                                                           | Absence of counseling.                                              |
|    |          |                                                                   | Doxycycline                    | <b>Lactmed:</b> Compatible in short-term use. Avoid prolonged use.<br><b>Hale:</b> L3. Avoid prolonged use >21 days (dental staining or decrease bone growth). |                                                                                                              |                                                                     |
|    |          |                                                                   | Piperacillin & Tazobactam      | <b>Lactmed:</b> ND. Probably Compatible.<br><b>Hale:</b> L2                                                                                                    |                                                                                                              |                                                                     |
| 43 | 10 days  | Purulent drainage from wounds                                     | Clindamycin                    | <b>Lactmed:</b> Probably Compatible. Use alternative drugs if possible.<br><b>Hale:</b> L2. LD. Probably Compatible.                                           | Pediatrician recommended discarding the breast milk.<br>Maternal decision to cease BF due to milk reduction. | Evidence-based counseling.                                          |
|    |          |                                                                   | Ciprofloxacin                  | <b>Lactmed:</b> Probably Compatible. Avoiding BF for 3-4 hours decreases the exposure.<br><b>Hale:</b> L3. Use alternative drugs if possible.                  |                                                                                                              |                                                                     |
| 44 | 60 days  | Purulent tonsillitis, allergy to antibiotic                       | Methylprednisolone (12 mg/day) | <b>Lactmed:</b> Compatible.<br><b>Hale:</b> L2                                                                                                                 | Maternal decision (internet information).                                                                    | Absence of counseling.                                              |
| 45 | 165 days | Influenza                                                         | Oseltamivir                    | <b>Lactmed:</b> LD. Compatible.<br><b>Hale:</b> L2                                                                                                             | Pathologist's and obstetrician's advice. Informed choice.                                                    | Erroneous counseling due to compatibility of the medicines with BF. |
|    |          |                                                                   | Clarithromycin                 | <b>Lactmed:</b> Probably Compatible. Risk for infantile hypertrophic pyloric stenosis (?).<br><b>Hale:</b> L1                                                  |                                                                                                              |                                                                     |
| 46 | 5 days   | Prophylactic administration for influenza (older's child illness) | Oseltamivir                    | <b>Lactmed:</b> LD. Compatible.<br><b>Hale:</b> L2                                                                                                             | Pediatrician's advice. Informed choice.                                                                      | Erroneous counseling due to compatibility of the medicine with BF.  |
| 47 | 45 days  | Herpes zoster                                                     | Valacyclovir                   | <b>Lactmed:</b> LD. Compatible.<br><b>Hale:</b> L2                                                                                                             | Obstetrician's/ Pediatrician's advice. Informed choice.                                                      | Erroneous counseling due to                                         |

|    |          |                              |                                                                     |                                                                                                                                                                                           |                                                                                                                                                       | compatibility of the medicine with BF.                                                                                                                                                                                                                                                                    |
|----|----------|------------------------------|---------------------------------------------------------------------|-------------------------------------------------------------------------------------------------------------------------------------------------------------------------------------------|-------------------------------------------------------------------------------------------------------------------------------------------------------|-----------------------------------------------------------------------------------------------------------------------------------------------------------------------------------------------------------------------------------------------------------------------------------------------------------|
| 48 | 4 days   | Hypertension                 | Methyldopa                                                          | <b>Lactmed:</b> Compatible.<br><b>Hale:</b> L2                                                                                                                                            | Pediatrician recommended continuation of BF. Maternal decision.                                                                                       | Evidence-based counseling.                                                                                                                                                                                                                                                                                |
|    |          |                              | Nifedipine                                                          | <b>Lactmed:</b> Compatible.<br><b>Hale:</b> L2                                                                                                                                            |                                                                                                                                                       |                                                                                                                                                                                                                                                                                                           |
| 49 | 60 days  | Hypertension                 | Methyldopa                                                          | <b>Lactmed:</b> Compatible<br><b>Hale:</b> L2                                                                                                                                             | Obstetrician/Paediatrician recommended discarding the breast milk. Maternal decision to cease BF due to milk reduction.                               | Erroneous counseling due to compatibility of the medicine with BF.                                                                                                                                                                                                                                        |
|    |          |                              |                                                                     |                                                                                                                                                                                           |                                                                                                                                                       |                                                                                                                                                                                                                                                                                                           |
| 50 | 135 days | Cholestasis                  | Ursodeoxycholic Acid                                                | <b>Lactmed:</b> Not classified<br><b>Hale:</b> L3                                                                                                                                         | Surgeon's/Pathologist's advice. Informed choice, (fear of harming her infant, although internet information indicated compatibility of the medicine). | Erroneous counseling. The HP could have advised the mother to take measures to minimize the infant's exposure. (e.g., administer the maternal dose after BF and before the infant's longest sleep).                                                                                                       |
|    |          |                              |                                                                     |                                                                                                                                                                                           |                                                                                                                                                       |                                                                                                                                                                                                                                                                                                           |
| 51 | 40 days  | Cholecystectomy              |                                                                     | <b>Lactmed:</b> Probably Compatible. Avoiding BF for 3-4 hours decreases the exposure (e.g., amoxicilline, cephalixin, ofloxacin).<br><b>Hale:</b> L3. Use alternative drugs if possible. | Surgeon's advice. Informed choice.                                                                                                                    | Erroneous counseling. The HP could have advised the mother to take measures to minimize the infant's exposure. [e.g., administer the maternal dose after BF and before the infant's longest sleep; avoid BF or discard breast milk for a certain period of time (e.g., 4 hours) after the maternal dose]. |
|    |          |                              | Ciprofloxacin                                                       |                                                                                                                                                                                           |                                                                                                                                                       |                                                                                                                                                                                                                                                                                                           |
|    |          |                              | Metronidazole                                                       | <b>Lactmed:</b> Opinions vary. Avoid long term therapy. Avoid BF for 12-24h after last maternal dose. Use alternative drugs if possible.                                                  |                                                                                                                                                       |                                                                                                                                                                                                                                                                                                           |
|    |          |                              | Amoxicillin                                                         | <b>Hale:</b> L2<br><br><b>Lactmed:</b> LD. Compatible.<br><b>Hale:</b> L1                                                                                                                 |                                                                                                                                                       |                                                                                                                                                                                                                                                                                                           |
| 52 | 150 days | Car accident-Hospitalization | Medicines that the mother cannot remember (included antiepileptics) |                                                                                                                                                                                           | Surgeon's/Pathologist's advice. Informed choice.                                                                                                      | Ambiguous recommendations due to inadequate information given about which                                                                                                                                                                                                                                 |

|    |         |                                              |                                         |                                                                                                            |                                                                                                |                                                                                                                                                       |
|----|---------|----------------------------------------------|-----------------------------------------|------------------------------------------------------------------------------------------------------------|------------------------------------------------------------------------------------------------|-------------------------------------------------------------------------------------------------------------------------------------------------------|
|    |         |                                              |                                         |                                                                                                            |                                                                                                | medicines were administered.                                                                                                                          |
| 53 | 40 days | Kidney colic/<br>Nephrolithiasis             | Alfuzosin                               | <b>Lactmed:</b> Not classified.<br><b>Hale:</b> L4                                                         | Pathologist's/<br>Obstetrician's advice.<br>Pediatrician in<br>accordance.<br>Informed choice. | Evidence-based<br>counseling.                                                                                                                         |
| 54 | 90 days | Hypercholesterol<br>emia                     | Atorvastatin                            | <b>Lactmed:</b> ND. Use<br>alternative drugs (e.g.,<br>Cholestyramine,<br>Colesevelam).<br><b>Hale:</b> L3 | Pathologist's advice.<br>Informed choice.                                                      | Erroneous<br>counseling. The HP<br>could have advised<br>the mother to take<br>measures to<br>minimize the<br>infant's exposure.<br>(e.g., milk bank) |
| 55 | 0 days  | Thrombophilia                                | Acetylosalicylic<br>Acid<br>(160mg/day) | <b>Lactmed:</b> Probably<br>compatible (low-dose)<br><b>Hale:</b> L2                                       | Haematologist's<br>advice.<br>Informed choice.                                                 | Erroneous<br>counseling due to<br>drug dose<br>compatibility with<br>BF.                                                                              |
| 56 | 0 days  | Illicit drug abuse/<br>former heroin<br>user | Methadone                               | <b>Lactmed:</b> Compatible.<br><b>Hale:</b> L2                                                             | Maternal decision.                                                                             | Absence of<br>counseling.                                                                                                                             |
| 57 | 0 days  | Illicit drug abuse/<br>former heroin<br>user | Buprenorphine &<br>Naloxone             | <b>Lactmed:</b> LD. Probably<br>Compatible.<br><b>Hale:</b> L2                                             | Maternal decision.                                                                             | Absence of<br>counseling.                                                                                                                             |

BF: Breastfeeding, LD: Limited Data, ND: No Data, PRL: Prolactin.

\* Maternal decision: the mother decides to cease breastfeeding in the absence of or contradictory to counseling. Maternal decision to cease breastfeeding due to milk reduction.

\*\* Informed choice: the mother agrees and follows the HP's counseling for breastfeeding cessation.
